# Supplementary material for: Manipulation of cuprous oxide surfaces for improving their photocatalytic activity
Source: Royal Society of Chemistry journal article supplement (doi:10.1039/c4ta00616j), 2014-01-01
Supplement: c4ta00616j1.pdf [file c4ta00616j1.pdf]

# Supporting Information

## **Manipulation of Cuprous Oxide Surfaces for Improving Their Photocatalytic Activity**

**Sanghwa Yoon<sup>a</sup>, Misung Kim<sup>b</sup>, In-Soo Kim<sup>c</sup>, Jae-Hong Lim<sup>\*b</sup> and Bongyoung Yoo<sup>\*a</sup>**

<sup>a</sup>Department of Materials Engineering, Hanyang University, Ansan-si, Gyeonggi-do  
426-791, Republic of Korea

<sup>b</sup>Electrochemistry Research Group, Materials Processing Division, Korea Institute of  
Materials Science, Changwon-si, Gyeongnam 641-831, Republic of Korea

<sup>c</sup>Department of Metallurgical Engineering, Dong-A University, Busan-si, 426-791,  
Republic of Korea

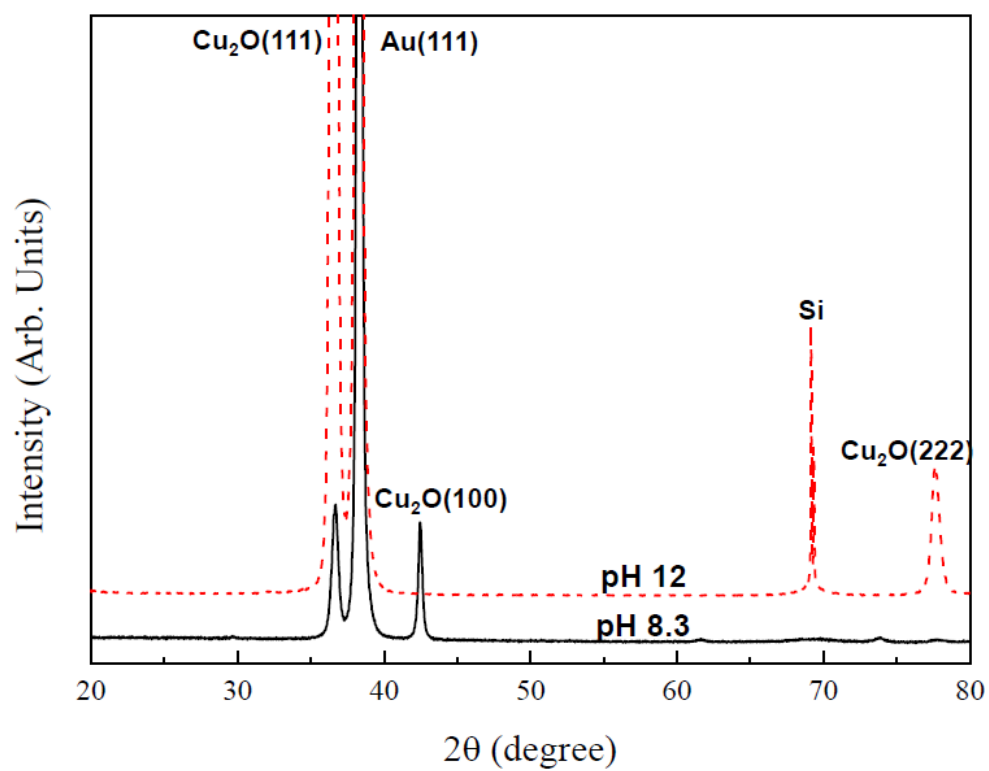

**FigureS1.** XRD patterns of the  $\text{Cu}_2\text{O}$  films deposited at bath pH values of 8.3 and 12.

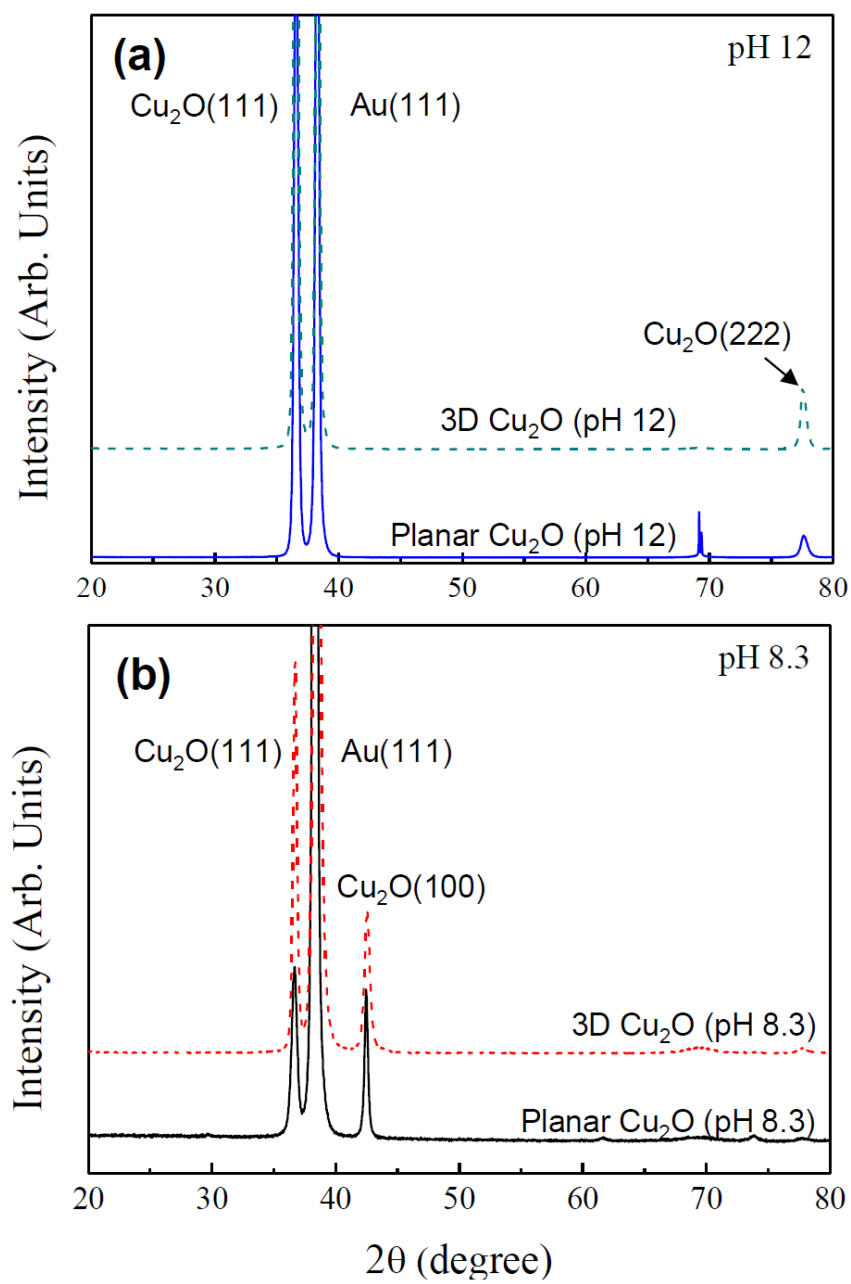

**FigureS2.** XRD patterns of the 2D and 3D  $\text{Cu}_2\text{O}$  films deposited at pH 8.3 and pH 12.

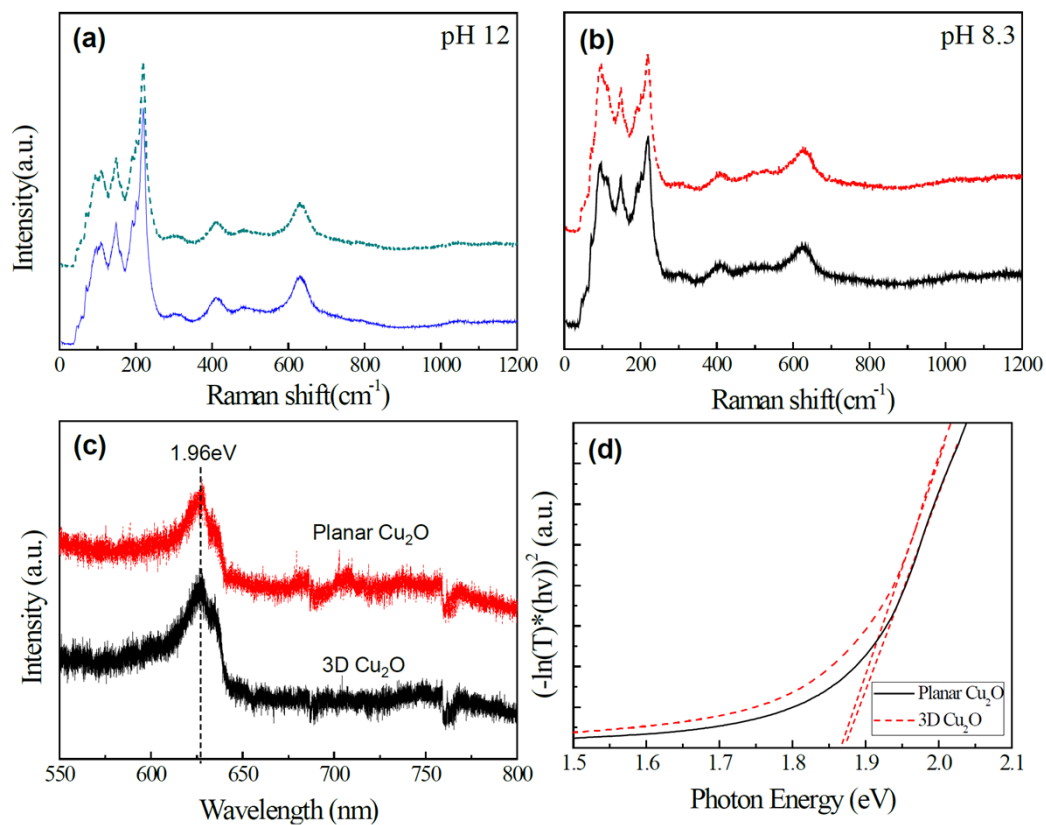

**Figure S3.** Raman spectra of the 2D and 3D  $\text{Cu}_2\text{O}$  films deposited at (a) pH 12 and (b) pH 8.3. (c) PL spectra of the 2D and 3D  $\text{Cu}_2\text{O}$  films and (d) the optical band gap of the  $\text{Cu}_2\text{O}$  films deposited at pH 12 using a template of PS beads 1000 nm in diameter.

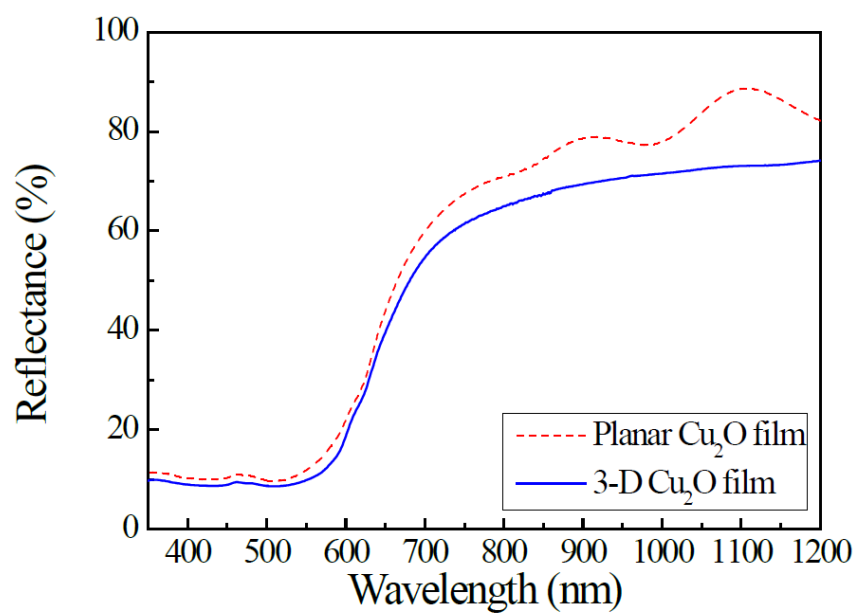

**Figure S4.** Reflectance spectra of the 2D and 3D  $\text{Cu}_2\text{O}$  films (deposited at pH 12) over wavelengths ranging from 350 to 1200 nm.

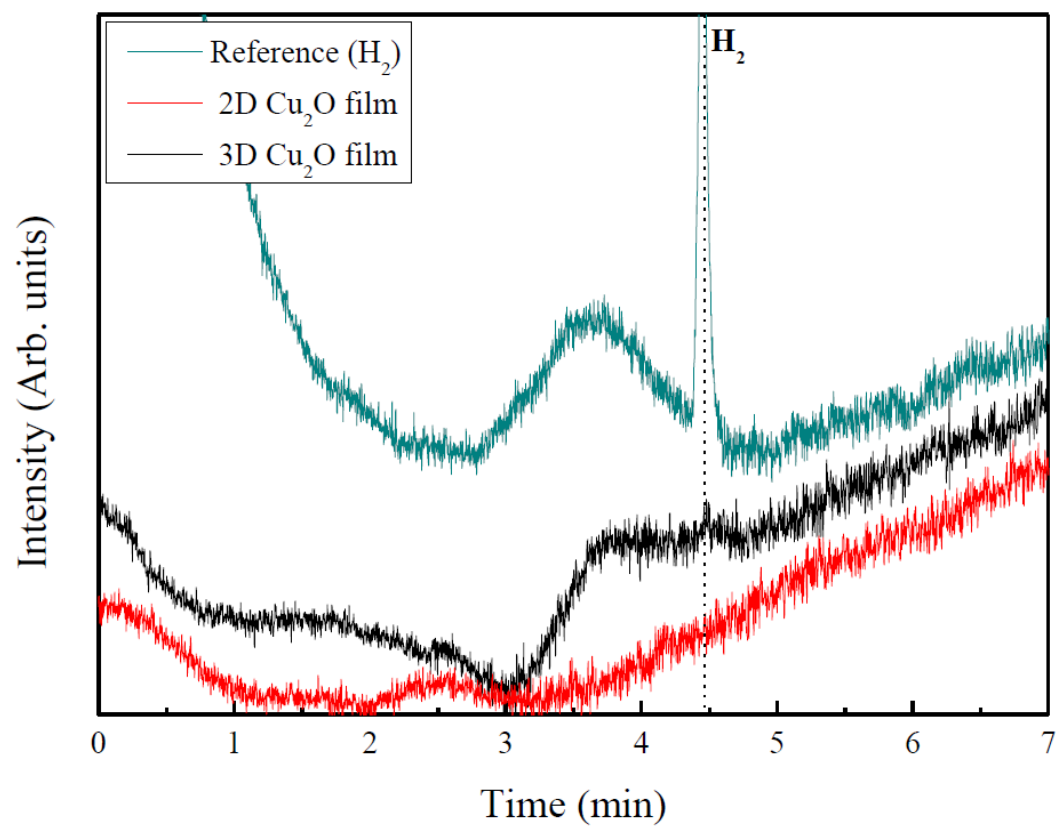

**Figure S5.** Gas chromatograph data demonstrating H<sub>2</sub> detection. The peak at 4.5 min is associated with H<sub>2</sub> gas.

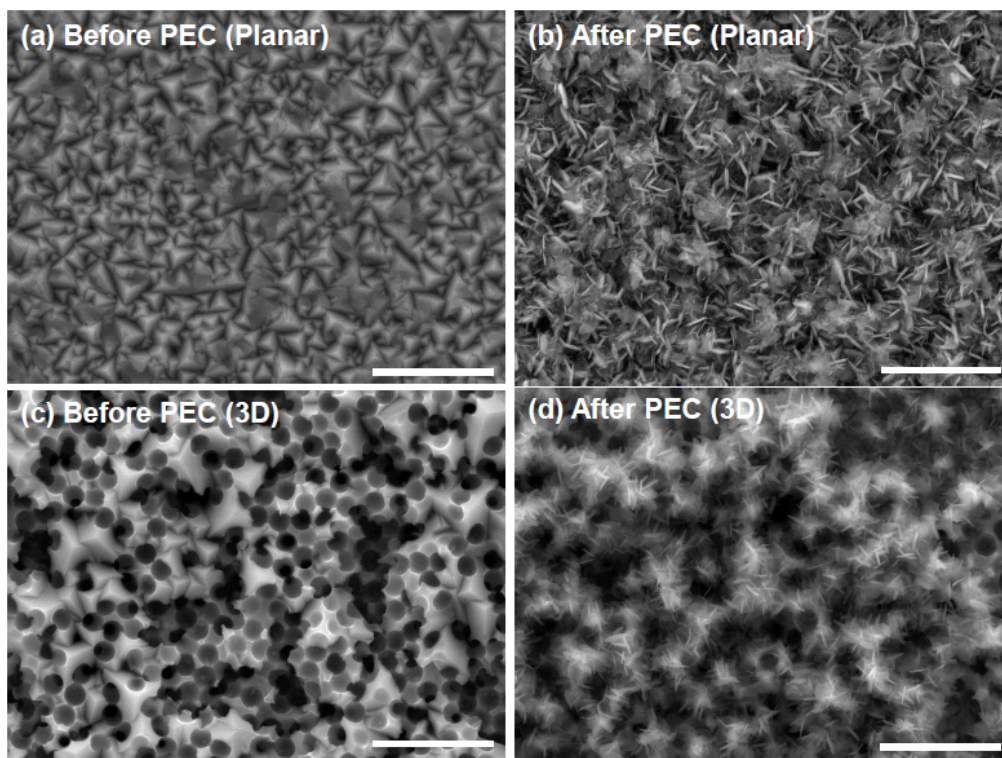

**Figure S6.** SEM images of 2D  $\text{Cu}_2\text{O}$  films (a) before PEC and (b) after PEC for 450s, and 3D  $\text{Cu}_2\text{O}$  films (c) before PEC and (d) after PEC at  $-0.6\text{ V}$  (vs.  $\text{Ag}/\text{AgCl}$ ). The scalebar is  $5\text{ }\mu\text{m}$ .

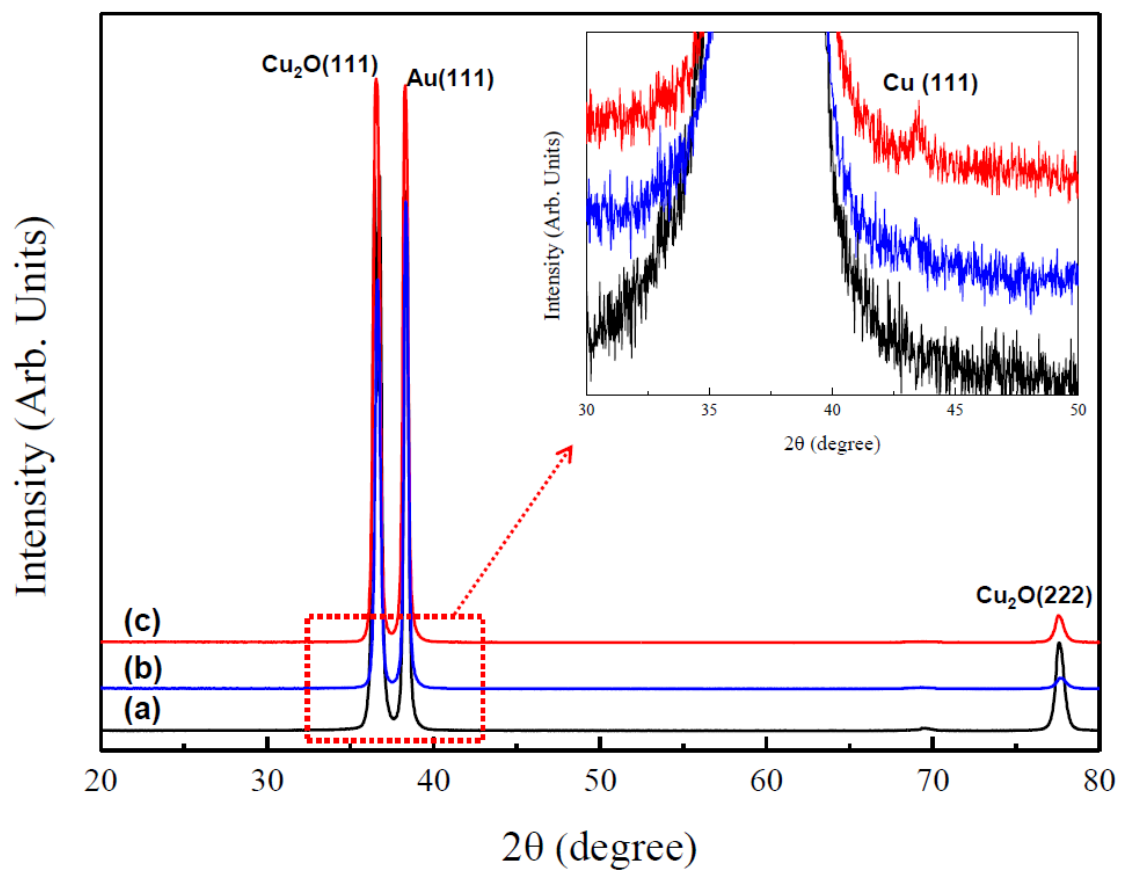

**Figure S7.** XRD patterns of (a) the 2D  $\text{Cu}_2\text{O}$  film before PEC measurement, (b) the 2D  $\text{Cu}_2\text{O}$  film after PEC measurement for 1 hr, and (c) 3D  $\text{Cu}_2\text{O}$  film after PEC measurement for 1 hr.
